# Supplementary figures and images for: The Effect of Formative Program Evaluation on Continuous Program Improvement: A Case Study of a Clinical Training Program in Lao PDR
Source: PubMed Central journal article supplement — J Korean Med Sci. 2015 Nov 30;30(12):1743–7. doi: 10.3346/jkms.2015.30.12.1743 (PMC4689817; doi:10.3346/jkms.2015.30.12.1743), 2015-11-30

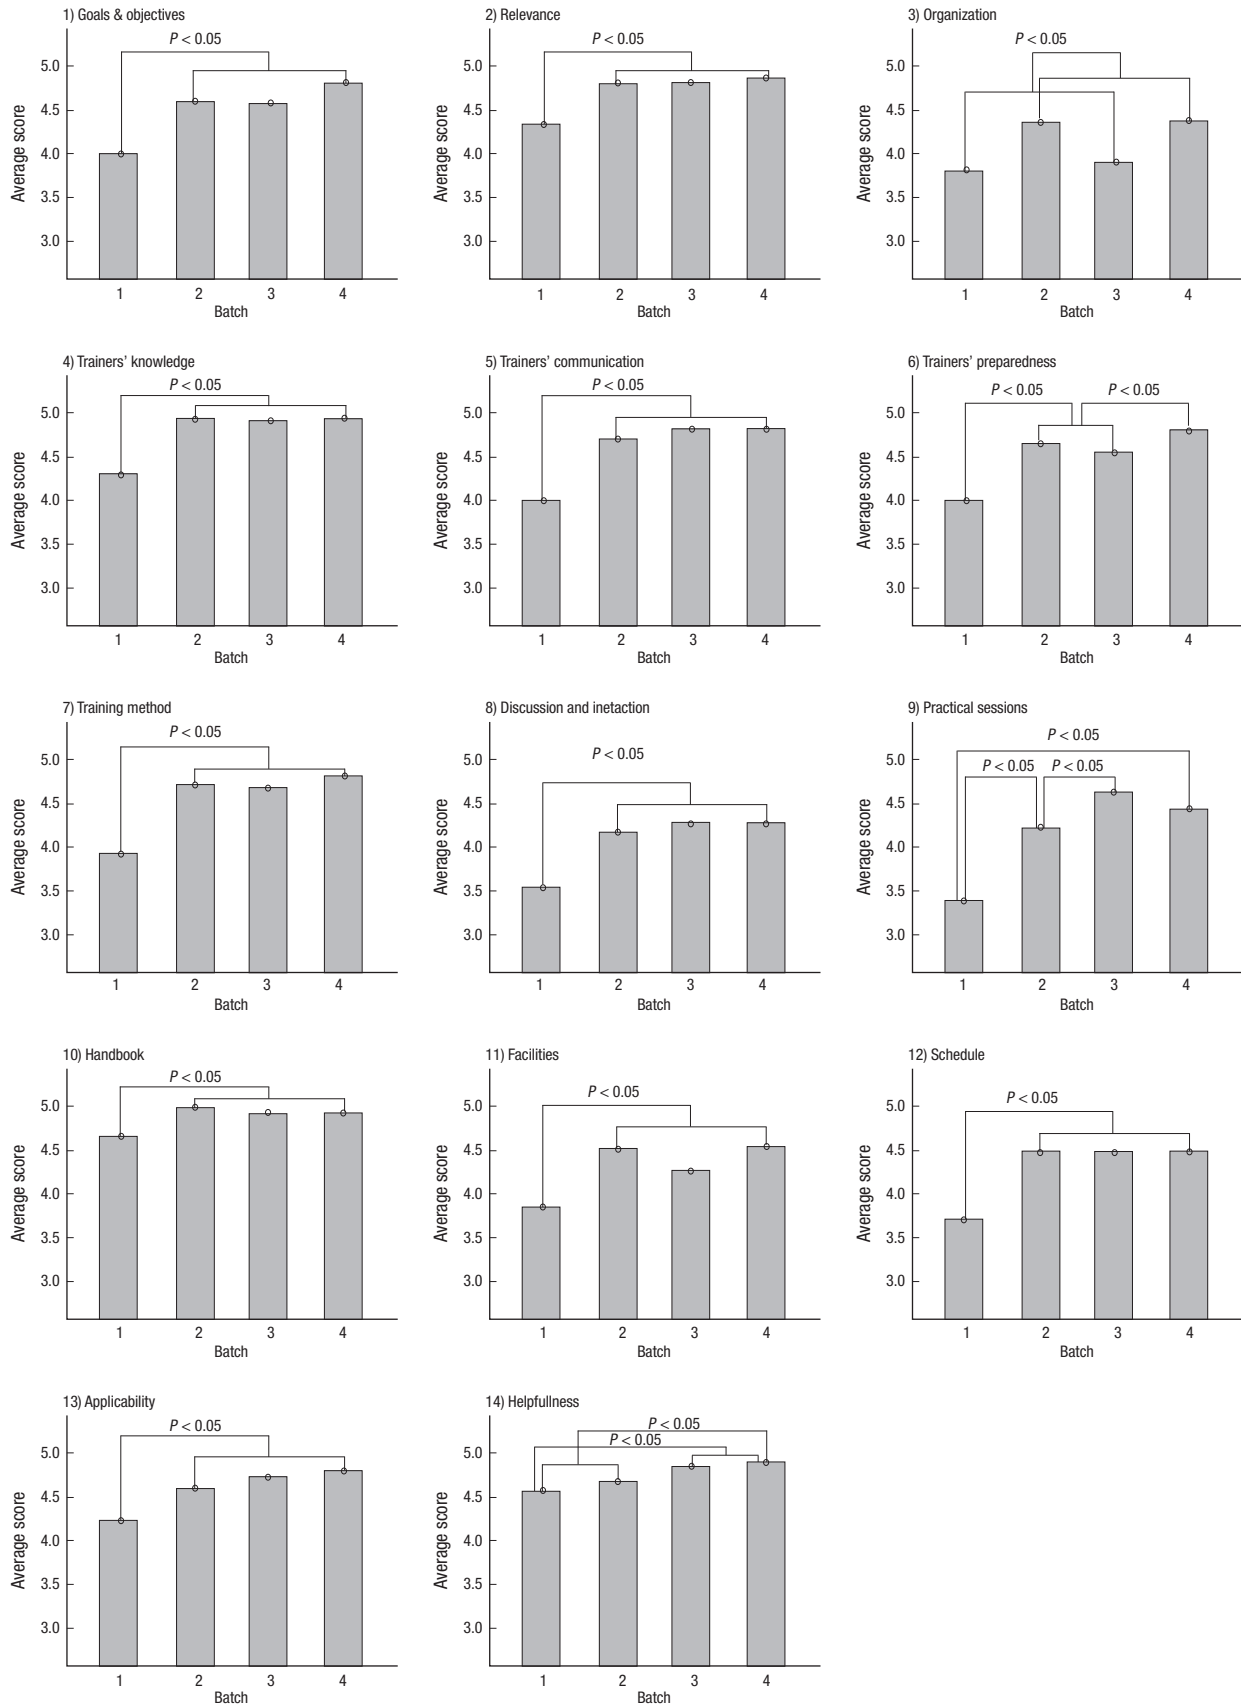

Supplementary Fig. 1. The improvement of the reaction of the trainees.

Supplement: jkms-30-1743-s001.pdf [file jkms-30-1743-s001.pdf]

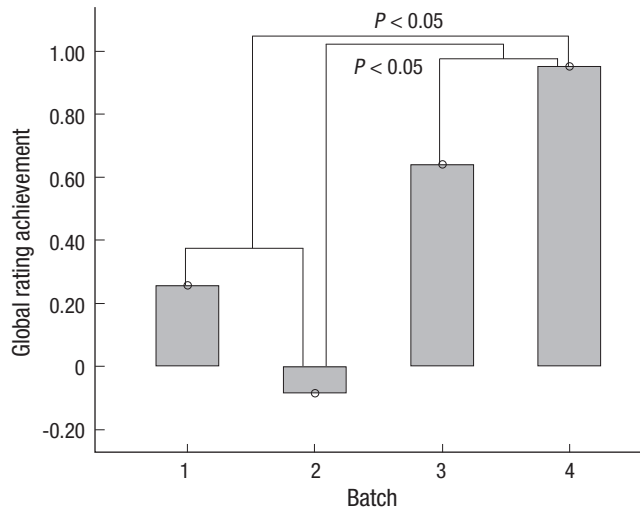

Supplementary Fig. 2. The improvement of the transfer of the trainees.

Supplement: jkms-30-1743-s002.pdf [file jkms-30-1743-s002.pdf]
